### Early revascularization in elderly with nstemi

T. Gonzalez Ferrero, B.A.A. Alvarez Alvarez, C.C.A. Cacho Antonio, M.P.D. Perez Dominguez, C.A.J.C. Abou Jokh, P.R.V. Rigueiro Veloso, R.A.B. Agra Bermejo, J.M.G.A. Garcia Acuna, J.R.G.J. Gonzalez Juanatey

University Hospital of Santiago de Compostela, Santiago de Compostela, Spain

Funding Acknowledgement: Type of funding source: None

**Objective:** This study sought to analyse the association of early coronary intervention with poor outcomes in patients  $\geq 75$  years with NSTEMI.

**Methods:** This retrospective observational study included 7811 NSTEMI patients between the years 2005 and 2017; 2451 were older than 75 years old. We compared baseline characteristics according to GRACE risk score.

**Results:** We found that 1486 patients (60.6%) underwent early invasive coronary intervention. The long-term all-cause mortality, cardiovascular

mortality and MACE differed significantly according to early coronary intervention (HR 0.67, 95% CI: 0.59–0.76; HR 0.64, 95% CI: 0.54–0.74; and HR 0.70, 95% CI: 0.63–0.78, respectively).

**Conclusion:** In elderly high-risk NSTEMI patients, early revascularization was associated with reduced all-cause and cardiovascular mortality and MACE.

Table 1. Clinical features of the patients according revascularization time delay in the whole cohort

| Time to revascularization | <24 hours  | >24 h       | p      |
|---------------------------|------------|-------------|--------|
| N                         | 965 (39.4) | 1486 (60.6) |        |
| Age                       | 82 (5)     | 80 (4)      | <0.001 |
| Female gender             | 407 (42.2) | 606 (40.8)  | 0.493  |
| Diabetes                  | 381 (39.5) | 461 (31.0)  | <0.001 |
| Hypertension              | 769 (79.7) | 1038 (69.9) | <0.001 |
| Dyslipidemia              | 490 (50.8) | 651 (43.8)  | 0.001  |
| Atrial fibrillation       | 91 (9.4)   | 217 (14.6)  | <0.001 |
| Creatinine (mg/dl)        | 1.2 (0.6)  | 1.1 (0.5)   | <0.001 |
| GRACE score               | 164 (36)   | 166 (31)    | <0.001 |
| GRACE score > 140         | 682 (70.7) | 1172 (78.9) | <0.001 |
| CRUSADE score             | 32 (19)    | 27 (19)     | 0.463  |
| LVEF (%)                  | 54 (13)    | 54 (11)     | 0.061  |
| Aspirin                   | 808 (83.7) | 1310 (88.2) | 0.002  |
| Clopidogrel               | 565 (58.5) | 1043 (70.2) | <0.001 |
| Oral Anticoagulants       | 116 (12.0) | 184 (12.4)  | 0.790  |
| Beta-blockers             | 678 (70.3) | 859 (57.8)  | <0.001 |
| ACE-ARB                   | 677 (70.2) | 915 (61.6)  | <0.001 |
| ARM                       | 25 (9.1)   | 101 (6.8)   | 0.175  |

ACEI: angiotensin-converter enzyme inhibitors; ARB: angiotensin receptor blocker; ARM: antagonist receptor mineralocorticoid; LVEF: left ventricle ejection fraction; STEMI: ST-elevation myocardial infarction.

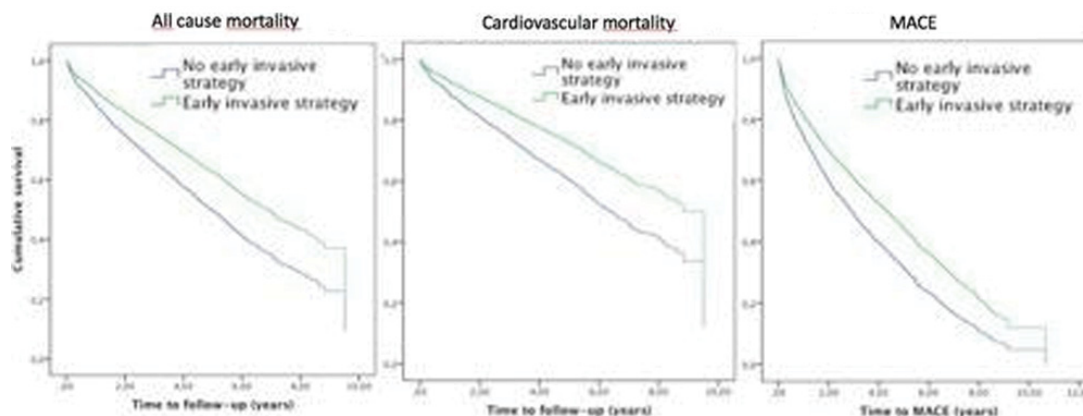

Downloaded from https://academic.oup.com/eurheartj/article/41/Supplement\_2/ehaa946.3233/6003745 by guest on 20 April 2024
